# Supplementary material for: Unveiling the future of breast cancer assessment: a critical review on generative adversarial networks in elastography ultrasound
Source: PubMed Central journal article supplement (PMC10731303; doi:10.3389/fonc.2023.1282536), 2023-12-06
Supplement: Image_1.pdf [file Image_1.pdf]

A comprehensive explanation of quantitative metrics is as follows:

**SSIM:** The metric accounts for the similarity between the luminance and contrast of the real EUS and V-EUS images to quantify the similarity.

$$SSIM(x, y) = \frac{(2\mu_x\mu_y + C_1)(2\sigma_{xy} + C_2)}{(\mu_x^2 + \mu_y^2 + C_1)(\sigma_x^2 + \sigma_y^2 + C_2)}, \quad (1)$$

where the numerator capture the intensity/luminance similarity between images using means ( $\mu$ ) and the contrast information through covariance ( $\sigma_{xy}$ ). The denominator scales the metric with respect to average luminance and contrast ( $\sigma_x, \sigma_y$ ) of the two images.

**MAPE:** This metric captures the average mean absolute error between stain ratios of the real EUS and V-EUS.

$$MAPE = \frac{1}{n} \sum_{i=1}^n \left| \frac{y_i - \hat{y}_i}{y_i} \right|, \quad (2)$$

where  $n$  denotes the total count in the elastogram. Variables  $y_i$  and  $\hat{y}_i$  represent the strain scores of the  $i^{\text{th}}$  location in the real and virtual elastograms, respectively.

**CHC:** This metric measures the correlation between the histograms of real and virtual EUS in the hue and saturation color space:

$$CHC = 1 - \sqrt{1 - \frac{\sum \sqrt{C_{real} \cdot C_{virtual}}}{\sqrt{\sum C_{real} \cdot \sum C_{virtual}}}}, \quad (3)$$

where  $C_{real}$  and  $C_{virtual}$  are vectors corresponding to the histogram bin count of real EUS and V-EUS, respectively.
